# Supplementary material for: Differential Antioxidant Response to Supplemental UV-B Irradiation and Sunlight in Three Basil Varieties
Source: MDPI journal article supplement (doi:10.3390/ijms242015350), 2023-10-19
Supplement: s1 [file s1]

# Supplementary Materials

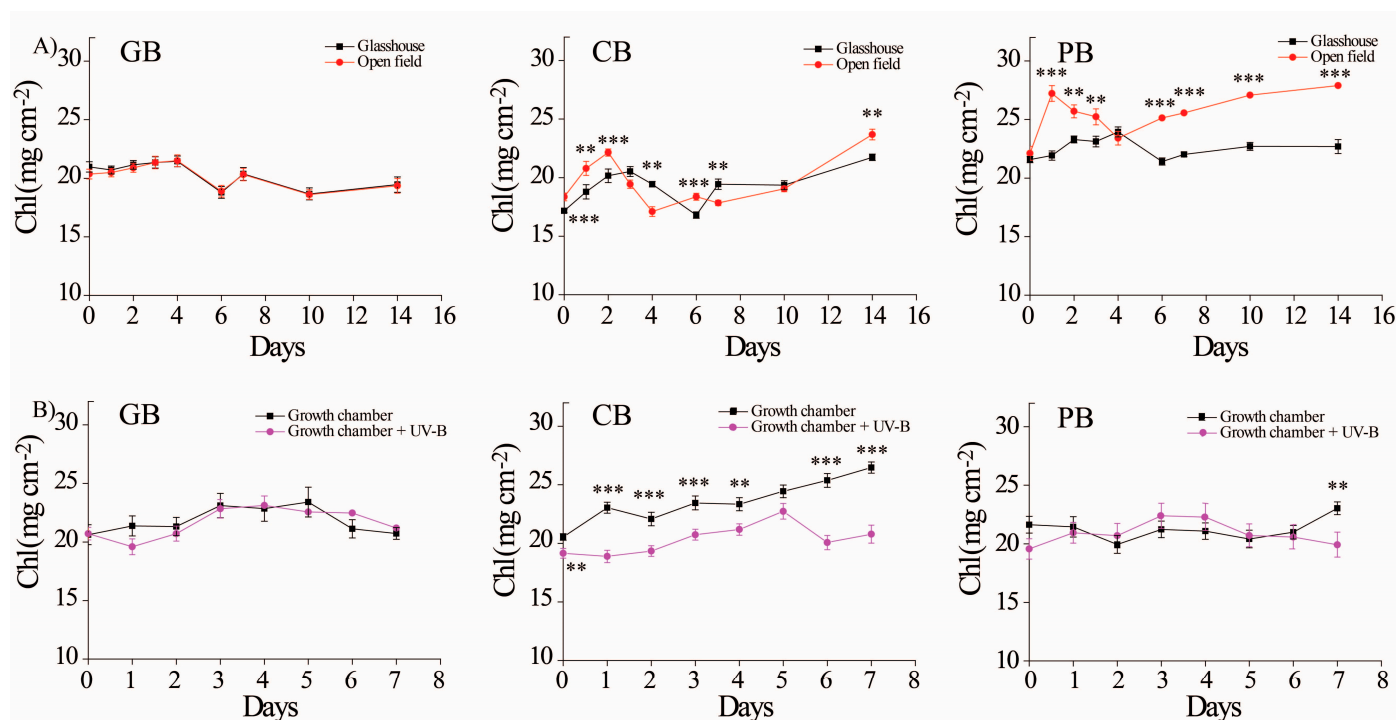

**Figure S1.** The dynamics of chlorophyll (mg cm<sup>-2</sup>) accumulation in the leaves of three basil varieties (*Ocimum basilicum* var. Genovese – GB, *n* = 20; *Ocimum × citriodorum* – CB, *n* = 20 and *Ocimum basilicum* var. *purpurascens* – PB, *n* = 20) grown in (A) glasshouse (GH – black line) and open field (OF – red line) during 15 days; (B) growth chamber (GC – black line) and growth chamber with additional UV-B supplementation (UV-B – red line) during 8 days. Values are given as means ± SE (\* *p* ≤ 0.05, \*\* *p* < 0.01, \*\*\* *p* < 0.001). Significant differences in EpFlav between plants grown in GH and OF, as well as between plants grown in GC and UV-B for all varieties according to Mann–Whitney U/-test are indicated.

**Table S1.** Repeated-measures analyses of variance (profile analyses) on chlorophyll accumulation determined during 16 (glasshouse – GH and open field – OF) and 8 days (growth chamber – GC and growth chamber + UV-B – UV-B) of the three basil varieties, *Ocimum basilicum* var. Genovese (GB), *Ocimum × citriodorum* (CB) and *Ocimum basilicum* var. *purpurascens* (PB).

| Trait | GH-OF, source    | Df   | F       | P > F   | Trait            | GC-UV-B, source | Df    | F       | P > F |
|-------|------------------|------|---------|---------|------------------|-----------------|-------|---------|-------|
| GB    | Between-subjects | 1;38 |         |         | Between-subjects | 1;57            |       |         |       |
|       | Light            |      | 0.182   | 0.67    | Light            |                 | 0.61  | 0.44    |       |
|       | Within-subjects  | 1;7  |         |         | Within-subjects  | 1;7             |       |         |       |
|       | Day              |      | 12.26   | <0.0001 | Day              |                 | 6.34  | <0.0001 |       |
|       | Day × Light      |      | 0.142   | <0.0001 | Day × Light      |                 | 1.16  | 0.33    |       |
| CB    | Between-subjects | 1;38 |         |         | Between-subjects | 1;60            |       |         |       |
|       | Light            |      | 0.77    | 0.38    | Light            |                 | 53.41 | <0.0001 |       |
|       | Within-subjects  | 1;7  |         |         | Within-subjects  | 1;7             |       |         |       |
|       | Day              |      | 41.33   | <0.0001 | Day              |                 | 16.52 | <0.0001 |       |
|       | Day × Light      |      | 20.59   | <0.0001 | Day × Light      |                 | 4.92  | <0.0001 |       |
| PB    | Between-subjects | 1;38 |         |         | Between-subjects | 1;60            |       |         |       |
|       | Light            |      | 22.06   | <0.0001 | Light            |                 | 14.10 | 0.18    |       |
|       | Within-subjects  | 1;8  |         |         | Within-subjects  | 1;7             |       |         |       |
|       | Day              |      | 1603.56 | <0.0001 | Day              |                 | 1.33  | 0.25    |       |
|       | Day × Light      |      | 25.00   | <0.0001 | Day × Light      |                 | 2.53  | 0.03    |       |

**Table S2.** Repeated-measures analyses of variance (profile analyses) on epidermal flavonoids (EpFlav) accumulation determined during 16 (glasshouse – GH and open field – OF) and 8 days (growth chamber – GC and growth chamber + UV-B – UV-B) of the of three basil varieties, *Ocimum basilicum* var. Genovese (GB), *Ocimum × citriodorum* (CB) and *Ocimum basilicum* var. *purpurascens* (PB).

| Trait | GH-OF, source    | Df   | F       | P > F   | Trait | GC-UV-B, source  | Df   | F      | P > F   |
|-------|------------------|------|---------|---------|-------|------------------|------|--------|---------|
| GB    | Between-subjects | 1;38 |         |         | GB    | Between-subjects | 1;57 |        |         |
|       | Light            |      | 1382.52 | <0.0001 |       | Light            |      | 12.294 | 0.001   |
|       | Within-subjects  | 1;8  |         |         |       | Within-subjects  | 1;7  |        |         |
|       | Day              |      | 66.57   | <0.0001 |       | Day              |      | 0.49   | 0.75    |
|       | Day × Light      |      | 75.32   | <0.0001 |       | Day × Light      |      | 1.06   | 0.38    |
| CB    | Between-subjects | 1;38 |         |         | CB    | Between-subjects | 1;60 |        |         |
|       | Light            |      | 582.85  | <0.0001 |       | Light            |      | 185.53 | <0.0001 |
|       | Within-subjects  | 1;7  |         |         |       | Within-subjects  | 1;7  |        |         |
|       | Day              |      | 337.23  | <0.0001 |       | Day              |      | 11.54  | <0.0001 |
|       | Day × Light      |      | 479.57  | <0.0001 |       | Day × Light      |      | 24.01  | <0.0001 |
| PB    | Between-subjects | 1;38 |         |         | PB    | Between-subjects |      |        |         |
|       | Light            |      | 402.78  | <0.0001 |       | Light            |      | 15.31  | <0.0001 |
|       | Within-subjects  | 1;7  |         |         |       | Within-subjects  | 1;7  |        |         |
|       | Day              |      | 236.93  | <0.0001 |       | Day              |      | 2.63   | 0.02    |
|       | Day × Light      |      | 188.29  | <0.0001 |       | Day × Light      |      | 3.09   | 0.01    |

**Table S3.** Two-way ANOVA results for the effects of three varieties, *O. basilicum* var. Genovese (GB), *O. × citriodorum* (CB) and *O. basilicum* var. *purpurascens* (PB), and different light conditions, as well as their interaction on the content of hydroxybenzoic acids (HBAs) in the basil leaves. The Dfs are shown in the brackets (the first number represents the Df of the main effects and their interactions and the second number is Df of error).

| Trait         | Source of variation | F      | P > F   | Trait | Source of variation | F      | P > F   |
|---------------|---------------------|--------|---------|-------|---------------------|--------|---------|
| PrcA          | Variety             | 257.21 | 0       | HBAs  | Variety             | 0.57   | 0.57    |
|               | Light               | 122.3  | 0       |       | Light               | 341.41 | 0       |
|               | Variety × Light     | 93.08  | 0       |       | Variety × Light     | 2.97   | 0.01    |
| <i>p</i> -HBA | Variety             | 55.72  | <0.0001 | GA    | Variety             | 0.15   | 0.86    |
|               | Light               | 8.08   | <0.0001 |       | Light               | 10.29  | <0.0001 |
|               | Variety × Light     | 34.85  | 0       |       | Variety × Light     | 6.37   | <0.0001 |

**Table S4.** Two-way ANOVA results for the effects of three varieties, *Ocimum basilicum* var. Genovese (GB), *Ocimum × citriodorum* (CB) and *Ocimum basilicum* var. *purpurascens* (PB), and different light conditions, as well as their interaction on the content of hydroxycinnamic acids (HCAs) in the basil leaves. The Dfs are shown in the brackets (the first number represents the Df of the main effects and their interactions and the second number is Df of error).

| Trait | Source of variation | F     | P > F   | Trait | Source of variation | F      | P > F   |
|-------|---------------------|-------|---------|-------|---------------------|--------|---------|
| RA    | Variety             | 1.63  | 0.2     | CA    | Variety             | 19.12  | 0       |
|       | Light               | 72.89 | 0       |       | Light               | 204.79 | 0       |
|       | Variety × Light     | 1.92  | 0.87    |       | Variety × Light     | 14.94  | 0       |
| HCAs  | Variety             | 38.43 | <0.0001 | pCA   | Variety             | 461.35 | 0       |
|       | Light               | 9.26  | <0.0001 |       | Light               | 54.85  | 0       |
|       | Variety × Light     | 0.27  | 0.95    |       | Variety × Light     | 71     | 0       |
| CGA   | Variety             | 28.43 | <0.0001 | FA    | Variety             | 1.02   | 0.36    |
|       | Light               | 73.57 | 0       |       | Light               | 2.09   | 0.11    |
|       | Variety × Light     | 7.57  | <0.0001 |       | Variety × Light     | 6.19   | <0.0001 |
| SA    | Variety             | 8.31  | <0.001  |       |                     |        |         |
|       | Light               | 26.21 | <0.0001 |       |                     |        |         |
|       | Variety × Light     | 3.96  | 0.002   |       |                     |        |         |

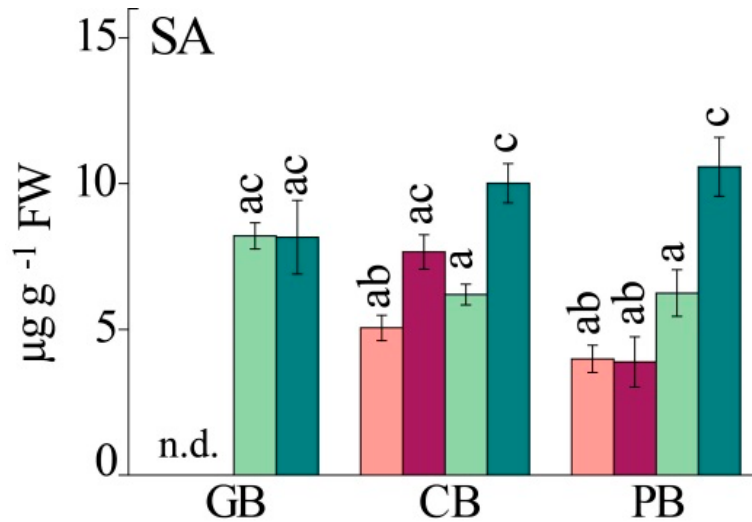

**Figure S2.** Content of sinapinic acid (SA) in the leaves of three basil varieties (*Ocimum basilicum* var. Genovese, GB, *Ocimum × citriodorum*, CB and *Ocimum basilicum* var. *purpurascens*, PB) grown under different conditions: glasshouse – GH (light purple), open field – OF (dark purple), growth chamber – GC (light green) and growth chamber + UV-B – UV-B (dark green)). Values are presented as means  $\pm$  SE ( $n = 7-9$ ). Different letters denote significant differences between different light conditions and basil varieties ( $p \leq 0.05$ ), according to Tukey's post hoc test. n.d.- not detected.

**Table S5.** Two-way ANOVA results for the effects of three varieties, *Ocimum basilicum* var. Genovese (GB), *Ocimum × citriodorum* (CB) and *Ocimum basilicum* var. *purpurascens* (PB), and different light conditions, as well as their interaction on the content of ECat, Cat, Q and Cy in the basil leaves. The *Dfs* are shown in the brackets (the first number represents the *Df* of the main effects and their interactions and the second number is *Df* of error).

| Trait              | Source of variation    | F      | P > F | Trait             | Source of variation    | F      | P > F |
|--------------------|------------------------|--------|-------|-------------------|------------------------|--------|-------|
| ECat<br>(Df: 1;85) | Variety                | 257.21 | 0     | Cat<br>(Df: 1;77) | Variety                | 227.32 | 0     |
|                    | Light                  | 122.3  | 0     |                   | Light                  | 274.76 | 0     |
|                    | Variety $\times$ Light | 93.08  | 0     |                   | Variety $\times$ Light | 84.51  | 0     |
| Q<br>(Df: 1;40)    | Variety                | 28.03  | 0     |                   |                        |        |       |
|                    | Light                  | 45.09  | 0     |                   |                        |        |       |
|                    | Variety $\times$ Light | 20.62  | 0     |                   |                        |        |       |

**Table S6.** Two-way ANOVA results for the effects of three varieties, *Ocimum basilicum* var. Genovese (GB), *Ocimum × citriodorum* (CB) and *Ocimum basilicum* var. *purpurascens* (PB), and different light conditions, as well as their interaction on the content of TAC, Asc content and POD activity in the basil leaves. The *Dfs* are shown in the brackets (the first number represents the *Df* of the main effects and their interactions and the second number is *Df* of error)..

| Trait             | Source of variation    | F      | P > F   | Trait             | Source of variation    | F      | P > F  |
|-------------------|------------------------|--------|---------|-------------------|------------------------|--------|--------|
| TAC<br>(Df: 1;36) | Variety                | 16.33  | <0.0001 | Asc<br>(Df: 1;36) | Variety                | 9.69   | <0.001 |
|                   | Light                  | 117.63 | 0       |                   | Light                  | 124.93 | 0      |
|                   | Variety $\times$ Light | 34.08  | <0.0001 |                   | Variety $\times$ Light | 16.59  | 0      |
| POD<br>(Df: 1;41) | Variety                | 111.38 | 0       |                   |                        |        |        |
|                   | Light                  | 424.45 | 0       |                   |                        |        |        |
|                   | Variety $\times$ Light | 115.36 | 0       |                   |                        |        |        |

**Table S7.** Relative total antioxidant activities of phenol compounds.

| Antioxidant      | IC <sub>50</sub> [μM] |
|------------------|-----------------------|
| Rosmarinic acid  | 2.391                 |
| Catechin         | 2.664                 |
| Epicatechin      | 3.562                 |
| Chlorogenic acid | 3.660                 |
| Quercetin        | 3.878                 |
| Cyanidin         | 5.849                 |
| Ferulic acid     | 6.843                 |
| Caffeic acid     | 7.551                 |
| Eriodictyol      | 8.402                 |
| Ascorbate        | 10.328                |

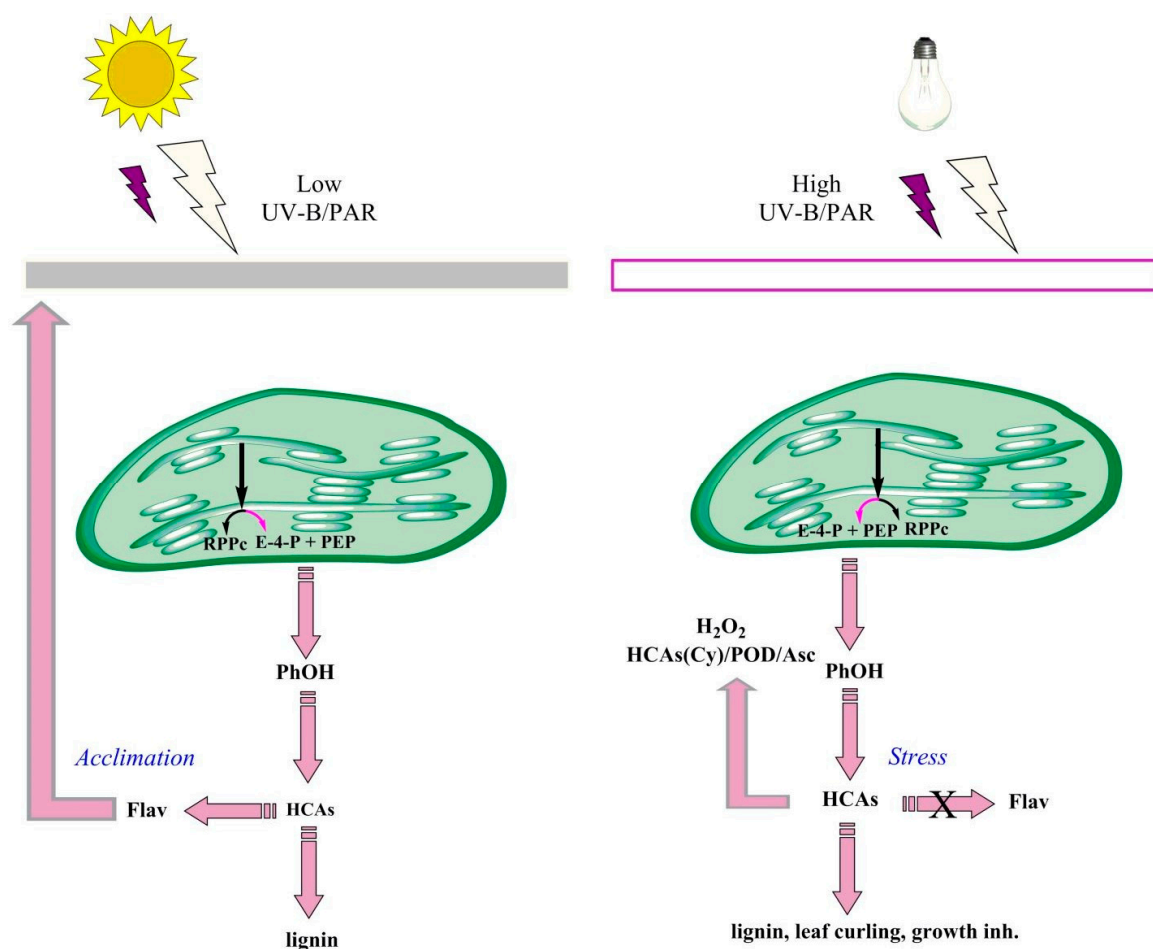

**Figure S3.** Schematic overview of the studied acclimative responses of three basil varieties to full sunlight from glasshouse or to UV-B compared to growth chamber. The precursors of wide range of phenylpropanoids are derived from the shikimate pathway located in chloroplasts, a key branching point between the primary and the secondary metabolism. This pathway directs carbon from glycolysis in the form of phosphoenolpyruvate (PEP) and from the reductive penthose phosphate cycle (RPP) in the form of erythrose-4-phosphate (E-4-P) towards synthesis of aromatic amino acids, phenylalanine and tyrosine, precursors for all phenolic compounds (PhOH). Both, flavonoids (Flav) and lignin are synthesized at the end of this metabolic pathway.
